# Supplementary material
Source: publisher figshare collection journal article supplement (https://tandf.figshare.com/articles/dataset/_/5278069)
Supplement: Supplementary file 3 [file 1]

**Supplement C: Example R Code for Conducting Sample Size Estimates for the Number of Days to Sample when Estimating Catch using the Multi-Day Estimator for Priest Lake, Idaho**

```
#Import data
data<-read.table(data)

#View first few rows of data
head(data)
  #Number    Date    EffortEst  ObservedCatch  ObservedHoursFished  DayType  Fishery
    #1      3/2/2014         0           0             0         WE    Priest
    #2      3/6/2014        27           1             3         WD    Priest
    #3      3/7/2014   54.13333           8            17         WD    Priest
    #4      3/8/2014   285.25          19            60         WE    Priest

#Set the number of weekend, week days, and total days in the population
N.we<-104
N.wd<-260
N<-N.we+N.wd

#Define actual catch
catch<-45008

#Calculate season catch rate
CR<-sum(data$ObservedCatch)/sum(data$ObservedHoursFished)

#Subset weekend and weekday data
we.data<-subset(data, DayType=='WE')
wd.data<-subset(data, DayType=='WD')

#Set sample sizes to evaluate
samp.size<-c(seq(2,10,2), seq(10,300,20), seq(310, 1000, 50))

#Set the number of iterations
reps<-5000
#Create an empty vector to store standard error estimates
se.ss<-c()

#Create a for loop to loop over the sample size vector
for(i in 1:length(samp.size)){
  #Allocate sample size to weekends and weekdays
  n.wd<-round(((5/7)*samp.size[i]))
```

```

n.we<-round(((2/7)*samp.size[i]))
#Create empty vector to store catch rate estimates
catch.est<-c()
  #Create a for loop to loop over iterations
  for(j in 1:reps){
    #Select days to sample with replacement, and conduct the
    #sampling and estimation process
    days.wd<-sample(c(1:nrow(wd.data)), n.wd, T)
    days.we<-sample(c(1:nrow(we.data)), n.we, T)
    wd.effort<-mean(wd.data$EffortEst[days.wd])*N.wd
    we.effort<-mean(we.data$EffortEst[days.we])*N.we
    wd.cr<-
    sum(wd.data$ObservedCatch[days.wd])/sum(wd.data$ObservedHoursFished[days.wd])
    we.cr<-
    sum(we.data$ObservedCatch[days.we])/sum(we.data$ObservedHoursFished[days.we])
    catch.est[j]<-wd.effort*wd.cr+we.effort*we.cr
  }
#Calculate empirical standard error
se.ss[i]<-sd(catch.est)
}
#Calculate relative confidence interval
CI.percent<-100*((1.96*se.ss)/catch)

#plot results
plot(CI.percent, samp.size, xlim=c(0,60), xlab='95% Relative CI (%)', ylab='Sample size (days)',
type='l')

```
